# Supplementary material for: Antiviral Ranpirnase TMR-001 Inhibits Rabies Virus Release and Cell-to-Cell Infection In Vitro
Source: MDPI journal article supplement (doi:10.3390/v12020177), 2020-02-05

**Table S1. Observation of Syrian hamsters administered TMR-001 once/day for 10 days**

| <b>Group</b>    | <b>Appearance</b>                                            | <b>Paresis</b> | <b>Paralysis</b> | <b>Seizure</b> | <b>Self-mutilation</b> | <b>Notes</b>                                          |
|-----------------|--------------------------------------------------------------|----------------|------------------|----------------|------------------------|-------------------------------------------------------|
| 0.1 mg/kg<br>IP | 100% (6/6)<br>redness on<br>lateral ventral<br>side by day 7 | 0% (0/6)       | 0% (0/6)         | 0% (0/6)       | 0% (0/6)               | Mild skin reaction                                    |
| 0.1 mg/kg<br>IM | Normal                                                       | 0% (0/6)       | 0% (0/6)         | 0% (0/6)       | 0% (0/6)               |                                                       |
| 0.1 mg/kg<br>IV | Normal                                                       | 0% (0/5)       | 0% (0/5)         | 0% (0/5)       | 0% (0/5)               | 1 euthanized due to<br>problem with catheter<br>day 0 |

**Figure S1. Effect of TMR-001 administration on body weight in healthy animals**

TMR-001 was administered intraperitoneal (IP, green), intramuscular (IM, red), or intravenous (IV, blue) at 0.1 mg/kg once-per-day for 10 days, and animals were observed for 28 days. Group size was 6 hamsters; except IV administration group size was 5 hamsters. The mean body weight in grams (g) and standard deviation for each group over time is shown. By day 4 and continuing to day 28, the average body weight for the IV administration group was significantly lower than both IM and IP groups (two-way ANOVA Tukey’s adjusted  $p$ -values  $<0.05$ ). No other differences were significant. No clinical signs were observed in any of the groups.

Fig. S1

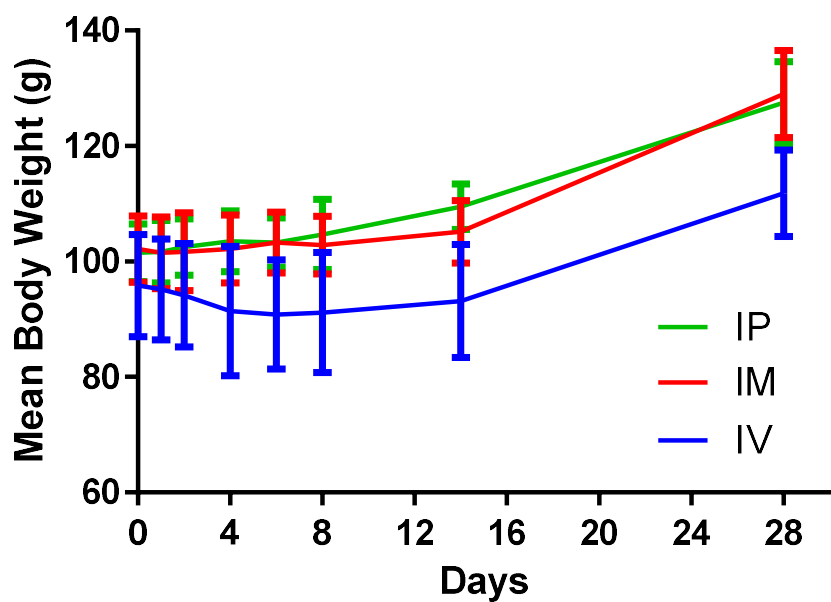

Supplement: s1 [file s1]
